# Supplementary material
Source: Springer Nature journal article supplement (https://www.springermedizin.de/resource/supplementary/12884_2013_922_MOESM1_ESM.pdf/9459028)
Supplement: MOESM1 [file 9459028]

Pregnant women in  
DELIVER with LVR1  
data **n = 5749**

Women excluded (**n = 2188**)  
- Start labour in obstetrician-led care  
- Birth < 37 weeks or > 42 weeks  
- medium risk pregnancy  
- prolonged rupture of membranes  
(> 24 hours without contractions)

Low risk women in  
midwife led care at  
onset of labour  
**n = 3561**

No postpartum questionnaire  
(PPQ) **n = 1301**  
Incomplete LAS data on PPQ  
**n = 66**  
Start of labour in primary care not  
certain **n = 82**

Study sample  
**n = 2112**

Planned  
place of birth  
at home  
**n = 1279**

Planned place  
of birth in  
hospital  
**n = 781**

Unknown  
**n = 52**
